# Supplementary material
Source: PubMed Central journal article supplement (PMC4074221)
Supplement: supp_jeb.087742_JEB087742.pdf [file supp_jeb.087742_JEB087742.pdf]

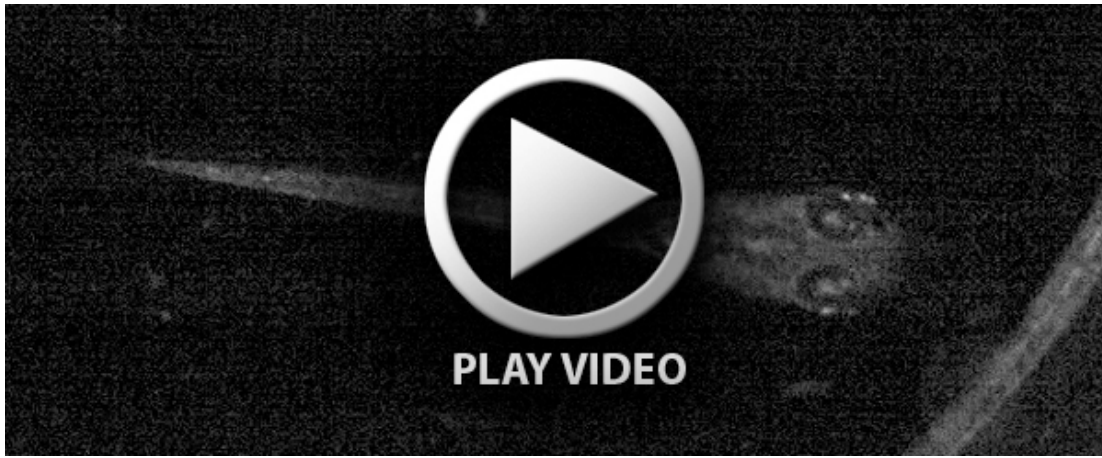

**Movie 1.** Zebrafish larva ignores paramecia in the dark. Video of a larval zebrafish surrounded by paramecia in dark behavioral testing conditions. No attempt to capture paramecia is made, despite their close proximity. This 4 s behavioral video was recorded at 60 frames  $s^{-1}$  and is played back at 20 frames  $s^{-1}$  (3 $\times$  speed reduction). Scale is 97 pixels  $mm^{-1}$ .

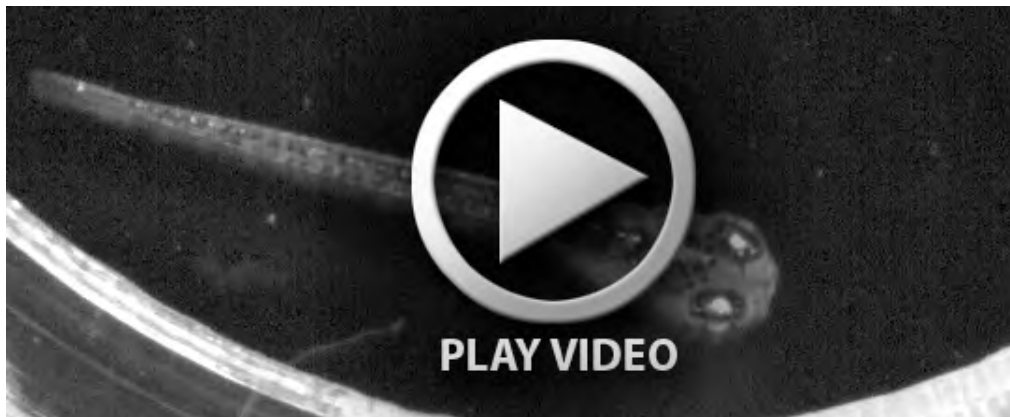

**Movie 2.** The same zebrafish larva in lit conditions captures a paramecium. Video of the larval zebrafish from [supplementary material Movie 1](#) demonstrating it can detect a relatively distant paramecium and perform prey capture, but only after it has been accommodated to the light. This 2 s behavioral video was recorded at 250 frames  $s^{-1}$  and is played back at 20 frames  $s^{-1}$  (12.5 $\times$  speed reduction). Scale is 97 pixels  $mm^{-1}$ .
